# Supplementary material for: Reversible cell cycle inhibition and premature aging features imposed by conditional expression of p16Ink4a
Source: PubMed Central journal article supplement (PMC4326901; doi:10.1111/acel.12279), 2014-12-06
Supplement: acel0014-0139-sd1.pdf [file acel0014-0139-sd1.pdf]

Figure-S1 Enders

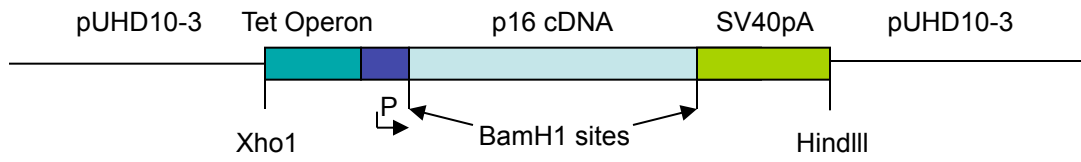

## Figure-S2 Enders

Lung

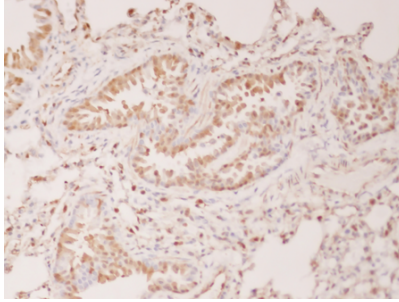

Liver

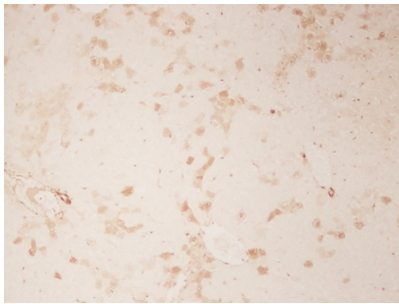

Pancreas

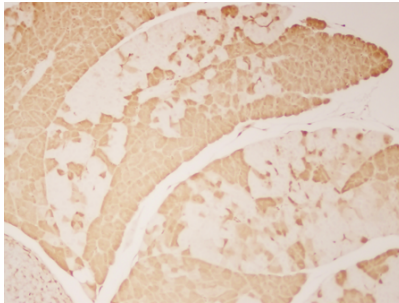

Kidney

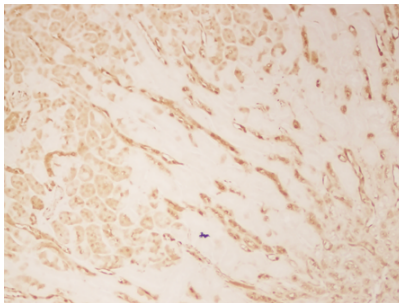

## Figure-S3 Enders

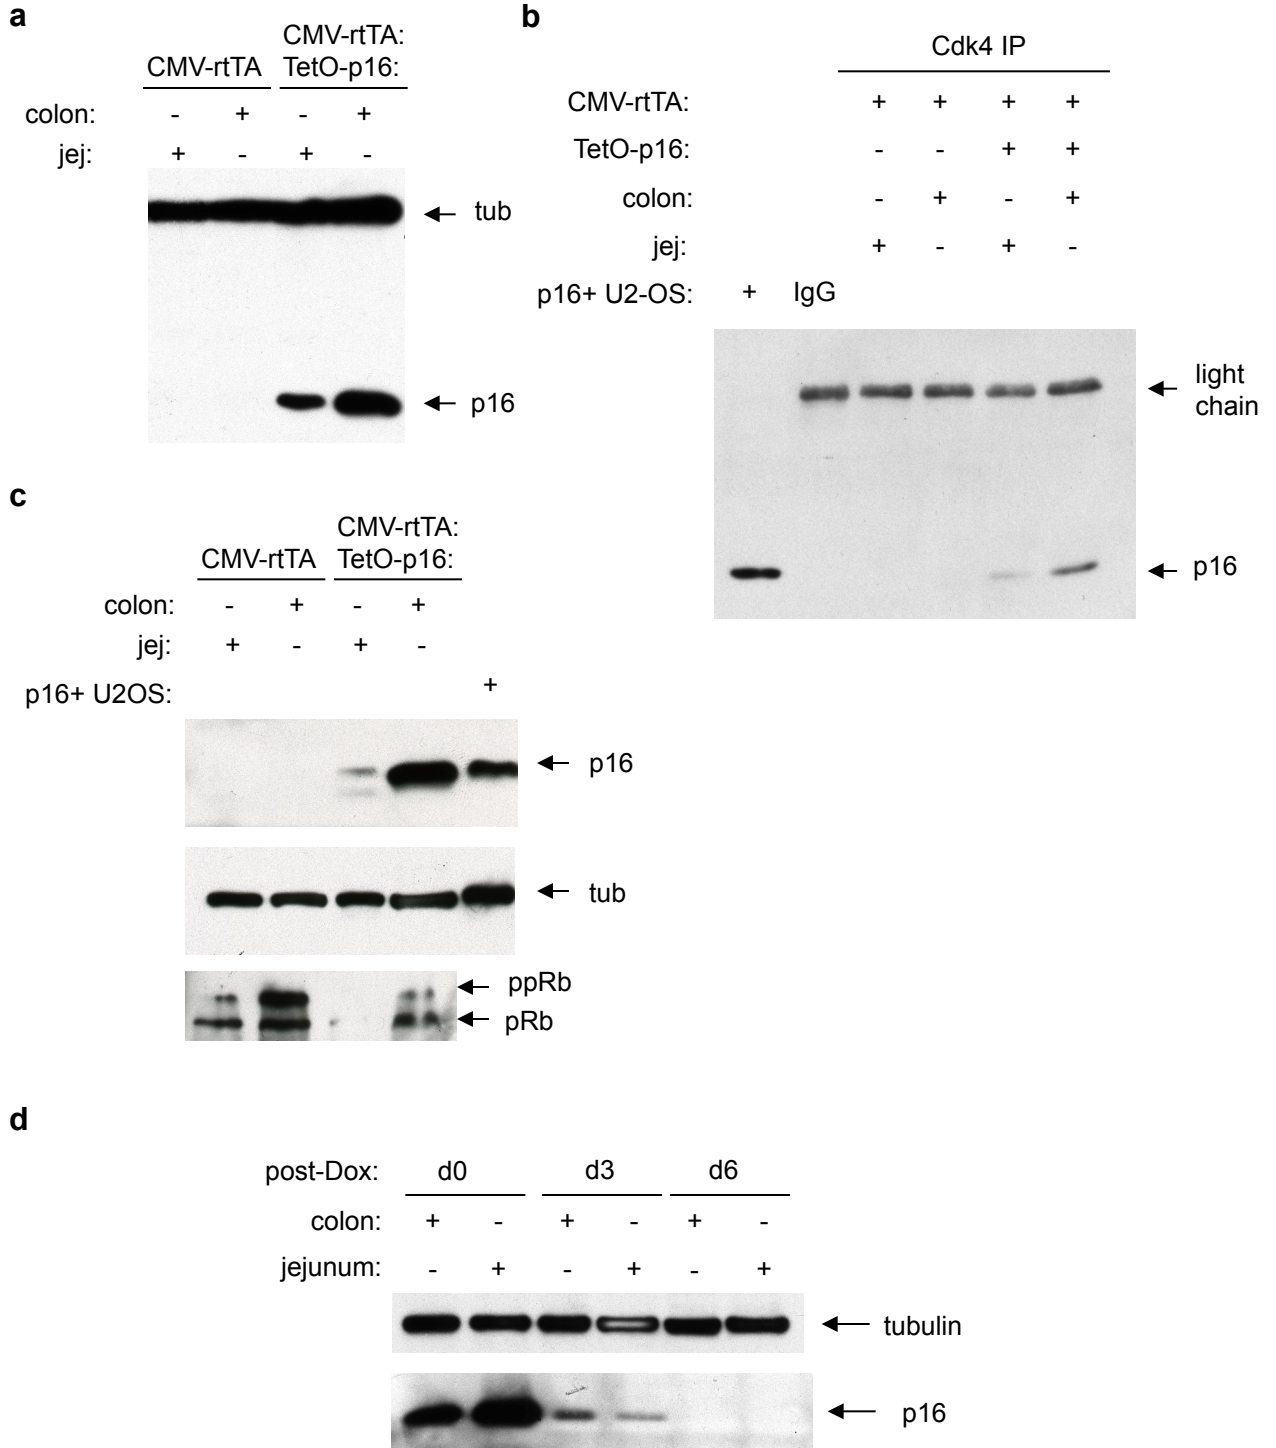

Figure-S4 Enders

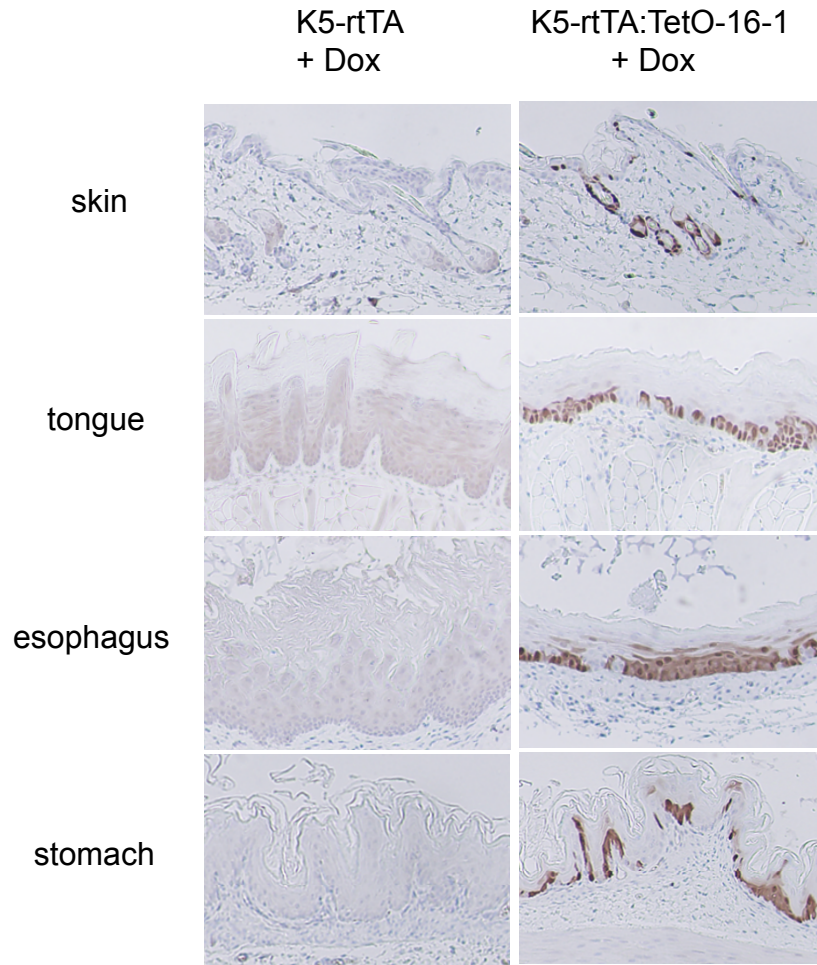

Figure-S5 Enders

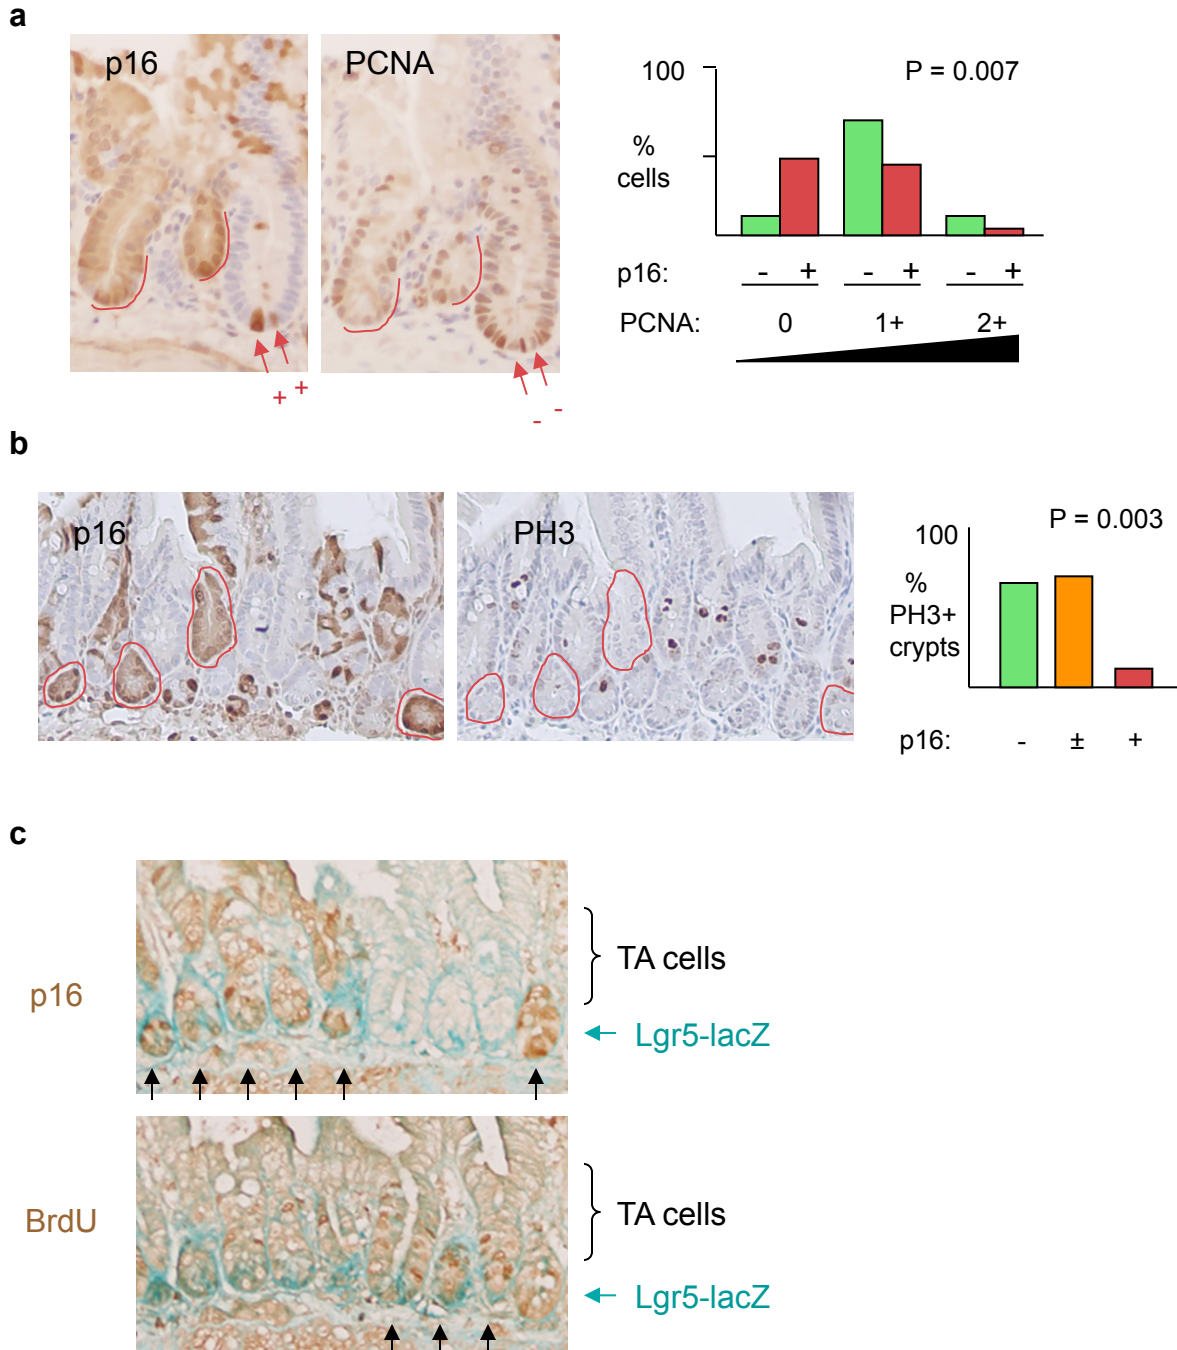

Figure-S6 Enders

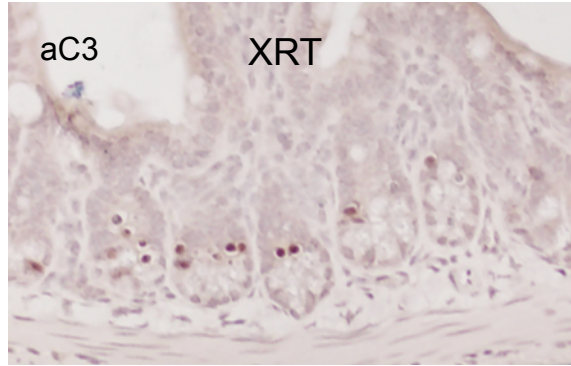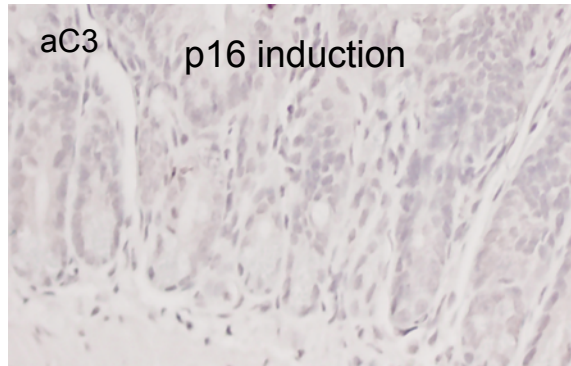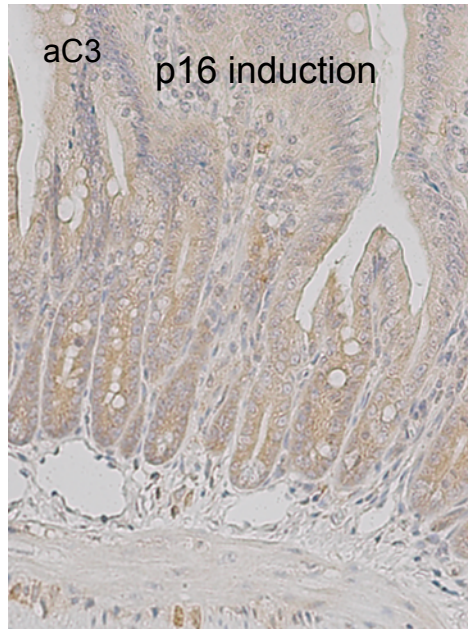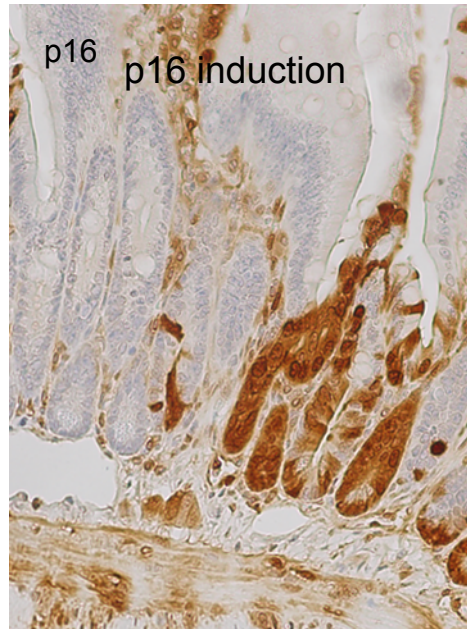

Serial sections:

Figure-S7 Enders

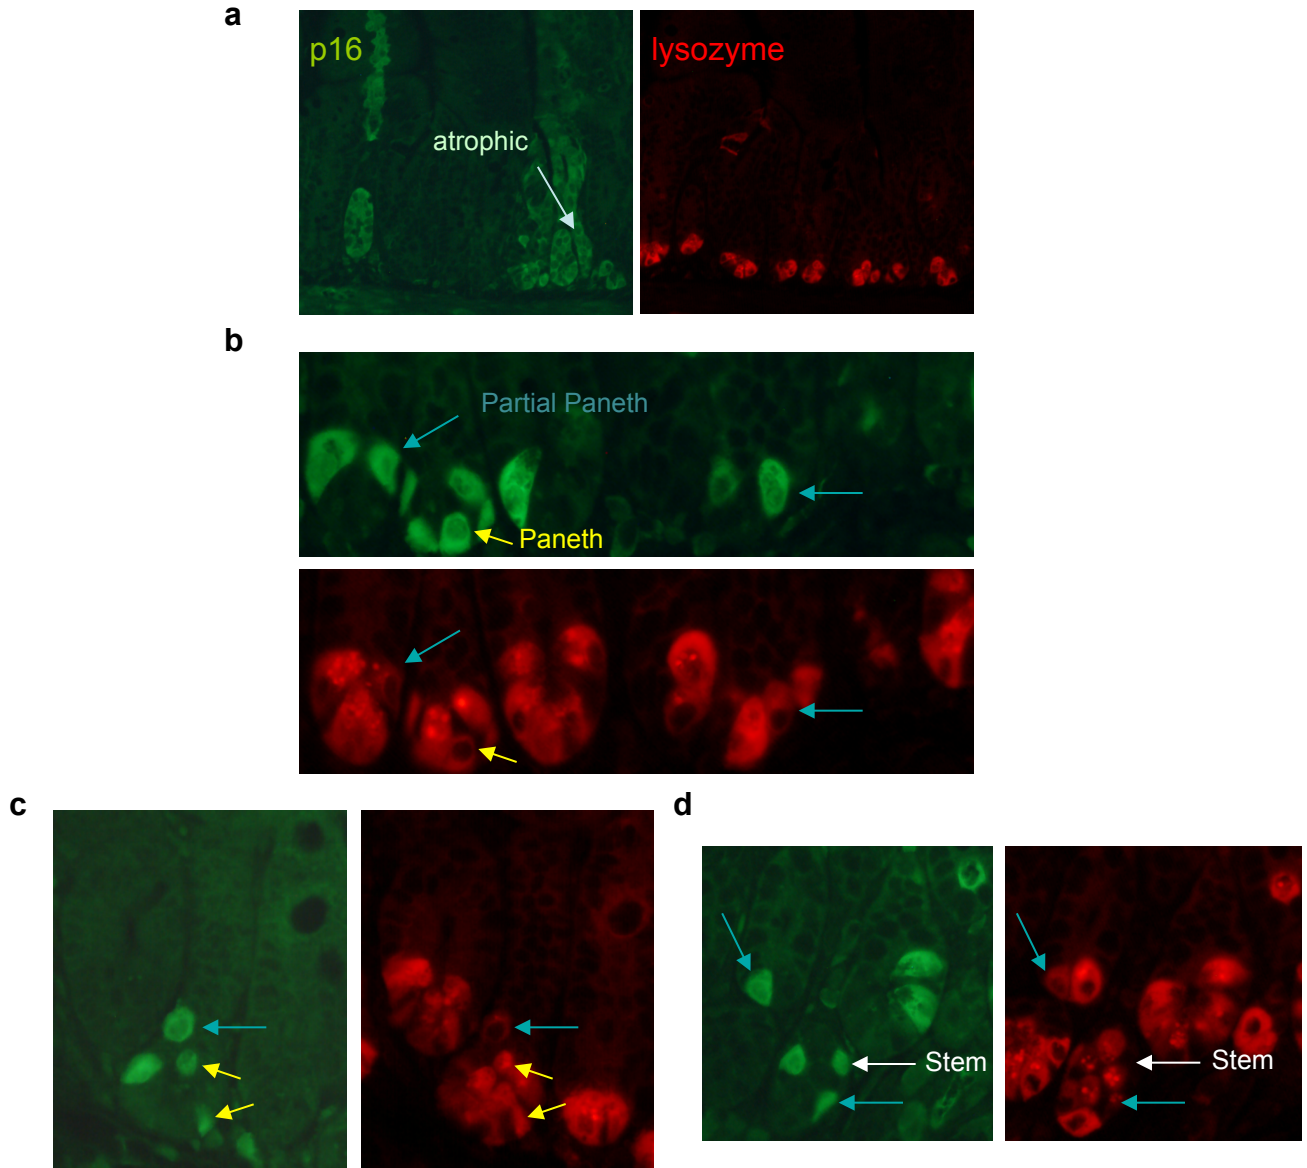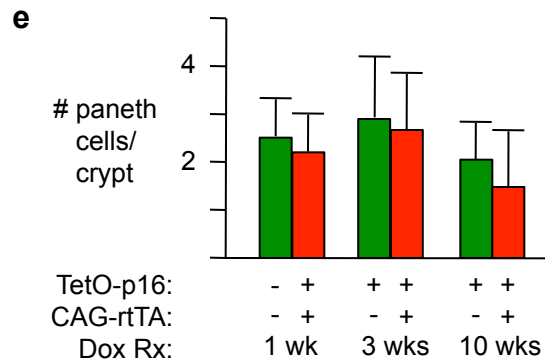

Figure-S8 Enders

CAGrtTA3:  
TetOp16

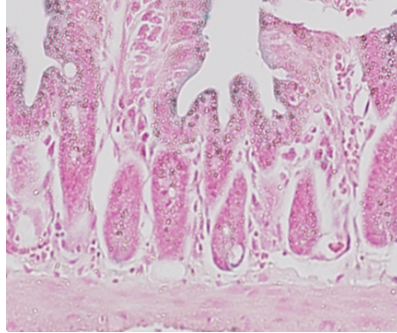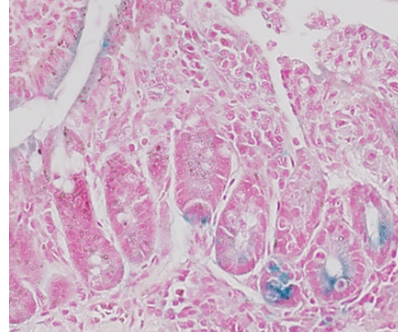

DBZ Rx

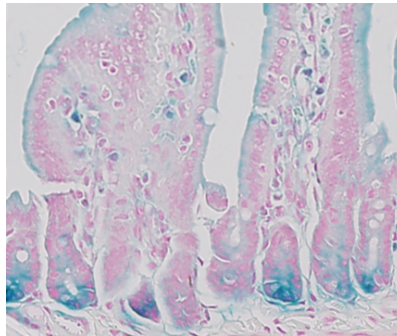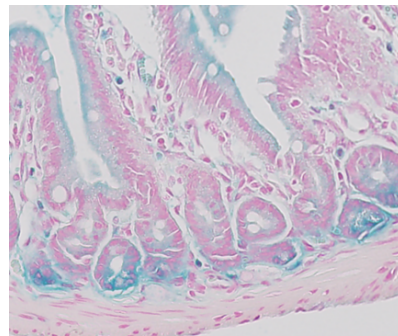



Figure-S9 Enders

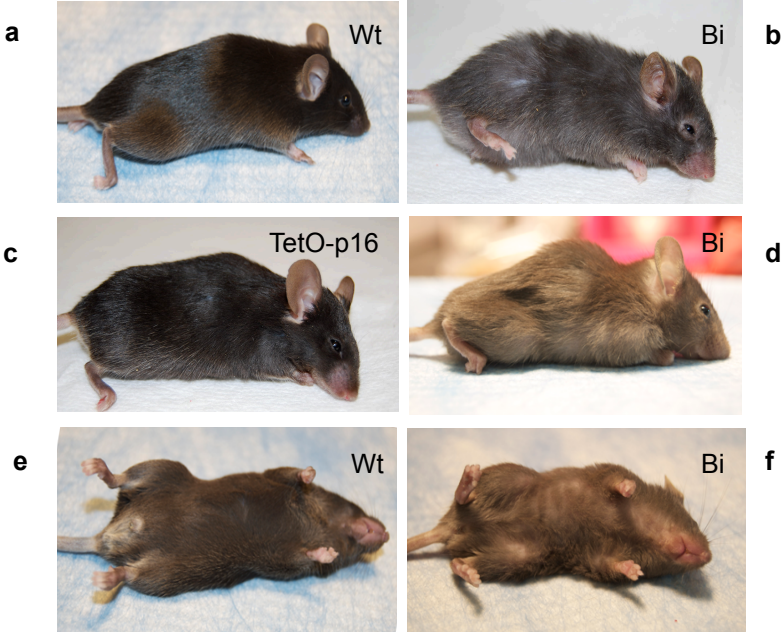

Figure-S10 Enders

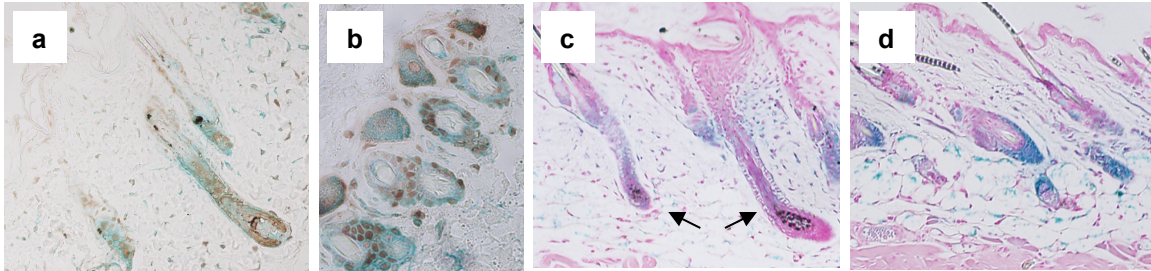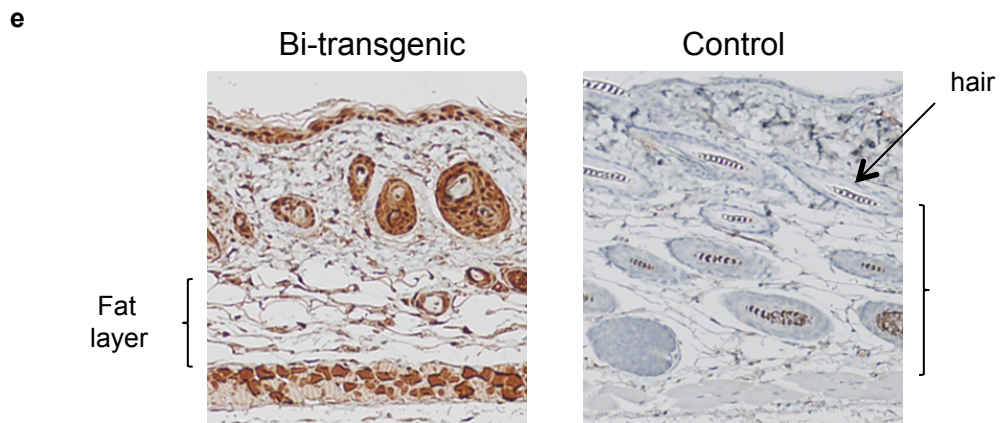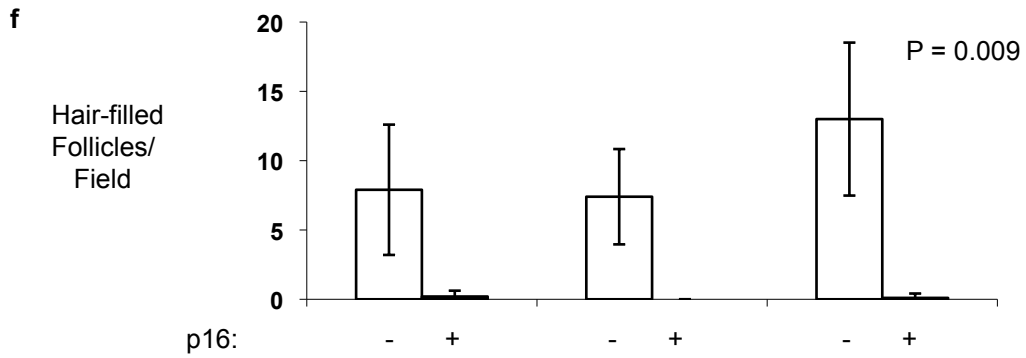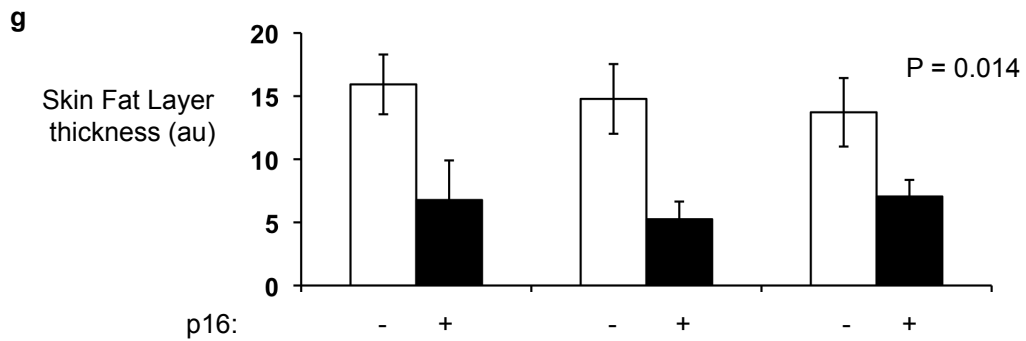

Figure-S11 Enders

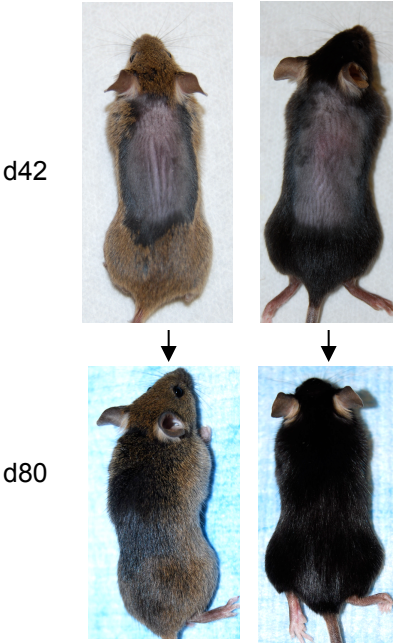

# Figure-S12 Enders

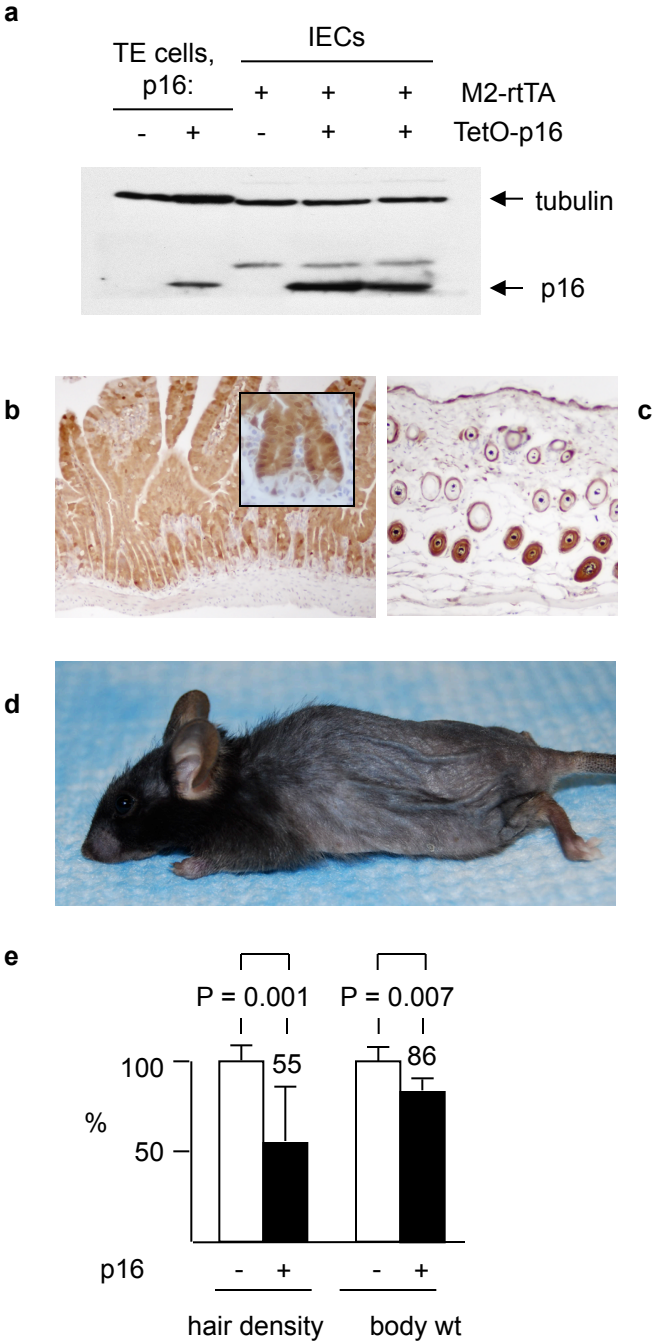

Figure-S13 Enders

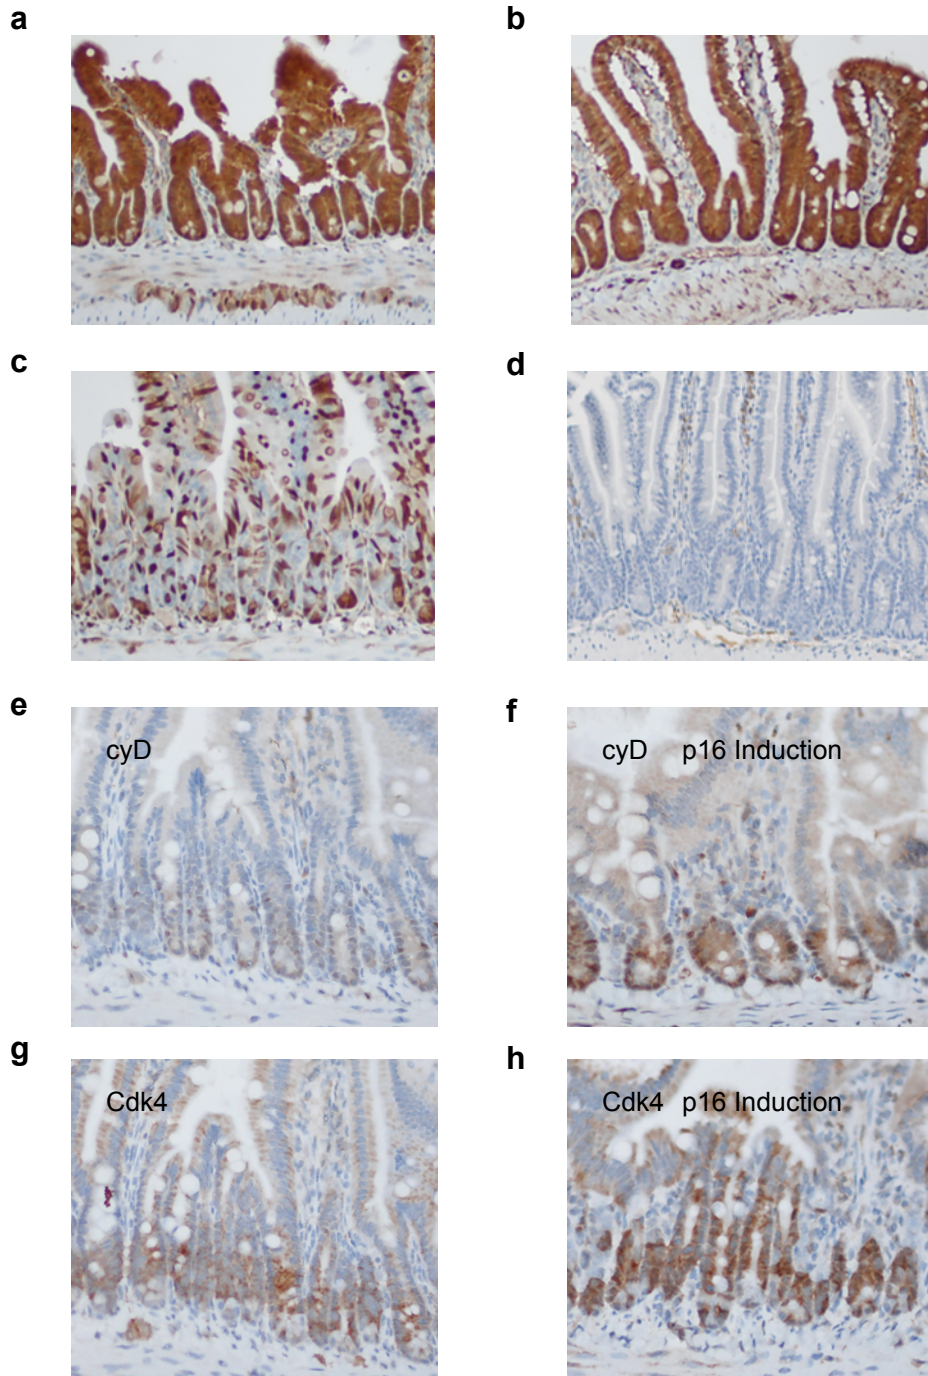

Figure-S14 Enders

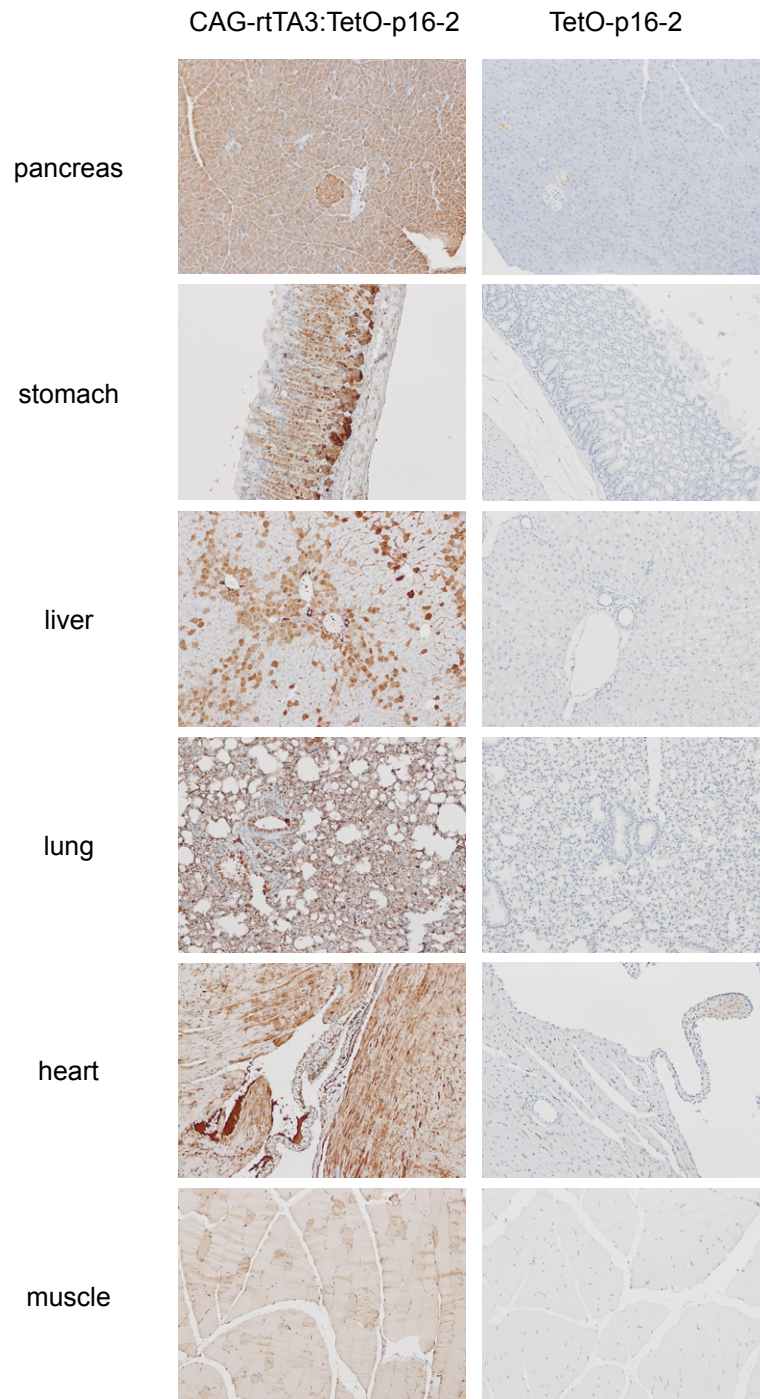

Figure-S15 Enders

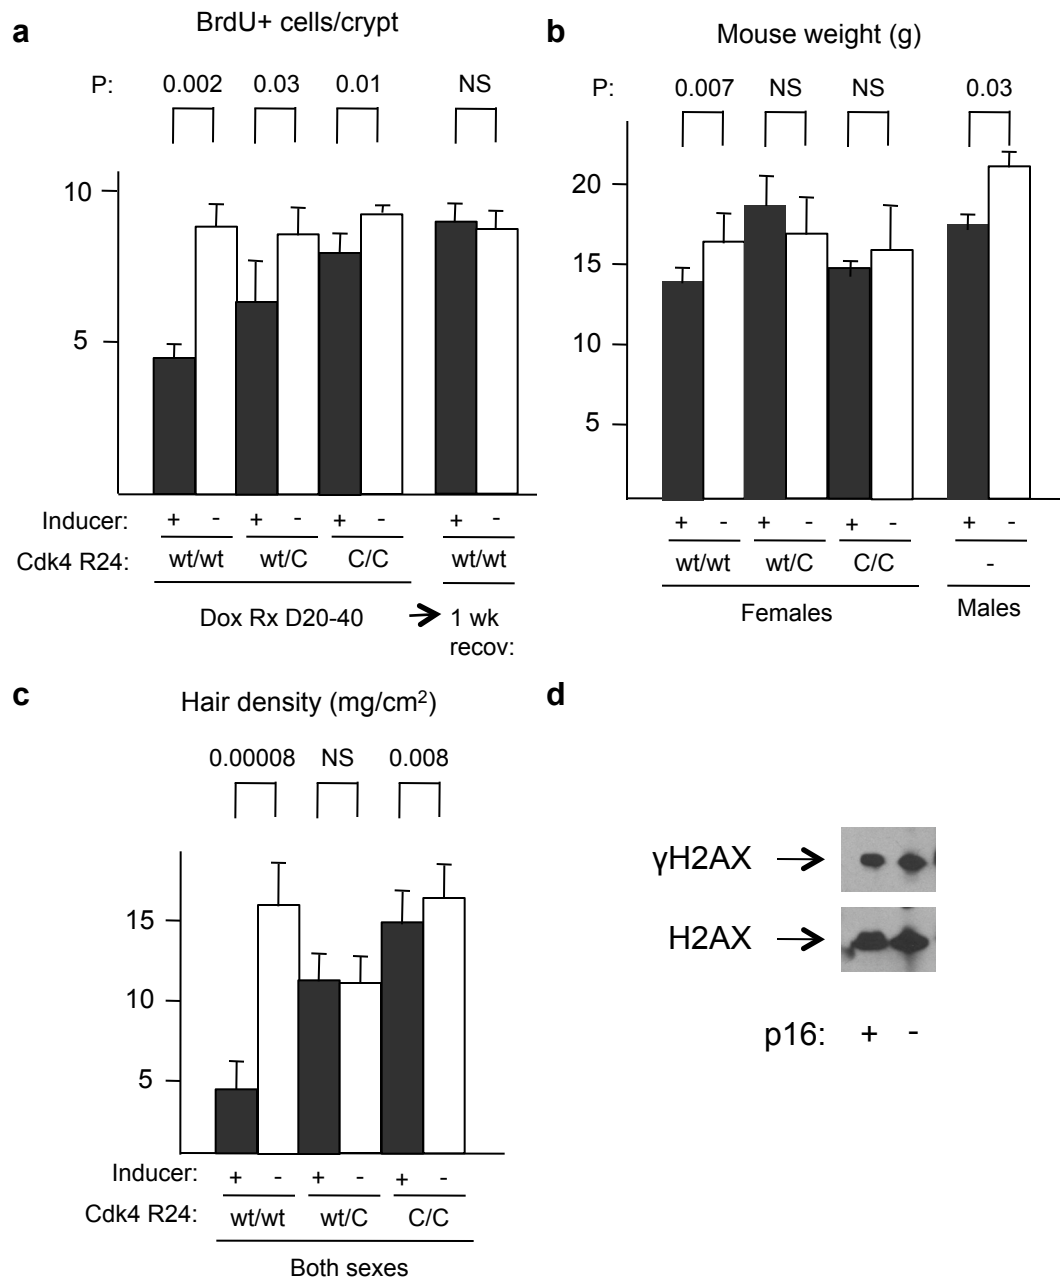

Figure-S16 Enders

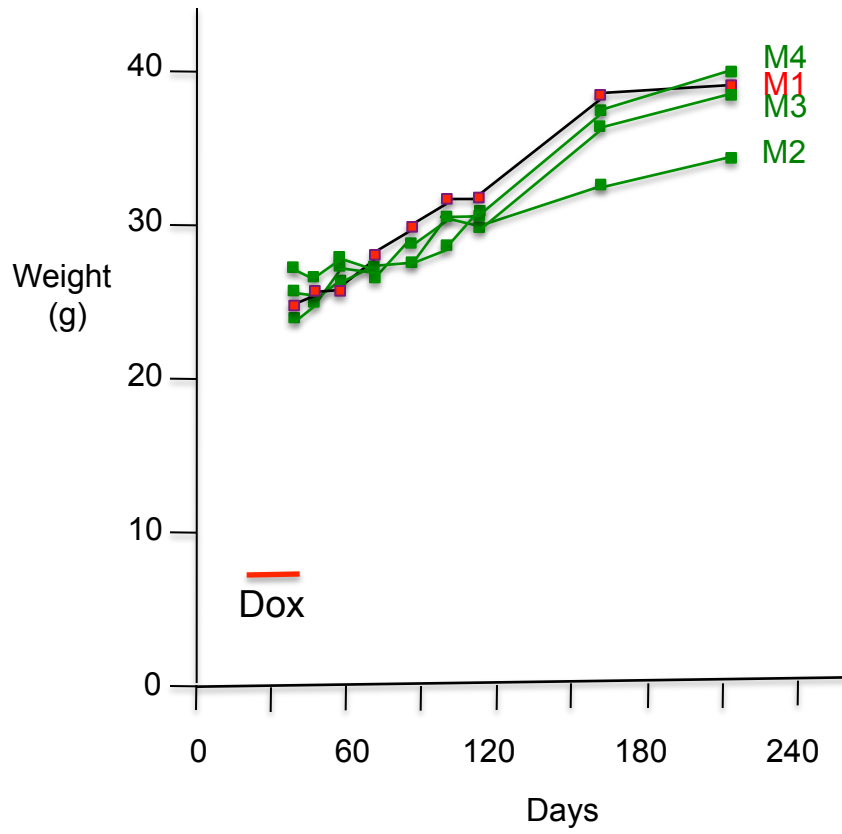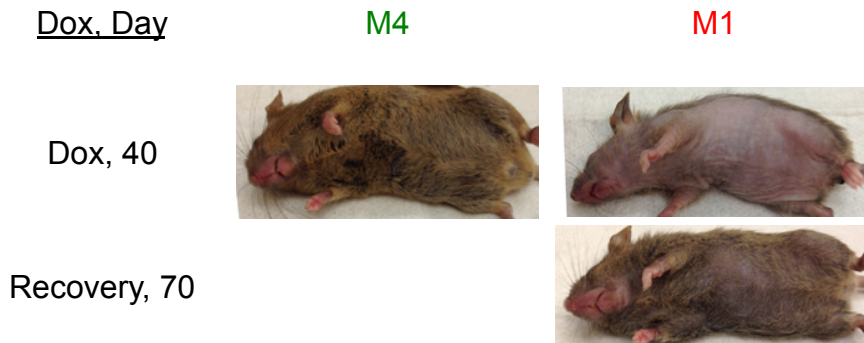



Figure S17-Enders

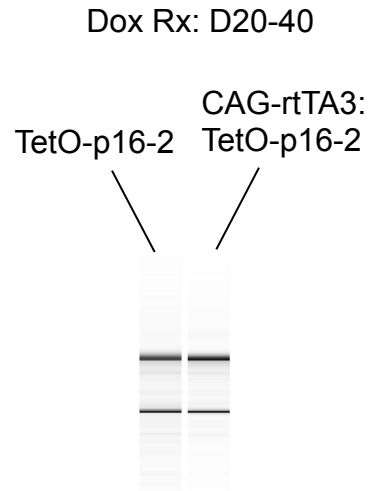

| Gene            | TetO-p16 | CAG-rtTA3:TetO-p16 |
|-----------------|----------|--------------------|
| CCND2           | 9.65     | 11.55              |
| Cdk4            | 7.6      | 8.6                |
| GM-CSF          | 5.31     | 5.35               |
| Gro-a/CXCI1     | 4.8      | 4.98               |
| Gro-b/CXCL-2    | 5.44     | 5.2                |
| Gro-c/CXCL-3    | 4.08     | 2.88               |
| ICAM1           | 6.22     | 5.88               |
| HCP-1/CCL-2     | 4.82     | 4.79               |
| HCP-2/CCL-8     | 4        | 3.98               |
| HCP-3/CCL-7     | 5.89     | 5.5                |
| HCP-4           | 6.86     | 6.77               |
| DcR2/Tnfrsf10b  | 7.88     | 7.96               |
| PAI-1/SERPINE-1 | 5.59     | 5.26               |
| IL-8            | 4.61     | 4.45               |
| IL-6            | 2.62     | 2.92               |
| OPG             | 5.58     | 5.77               |

Log2 scale
